# Supplementary material for: Diversity analyses in two ornamental and large-genome Ranunculaceae species based on a low-cost Klenow NGS-based protocol
Source: Front Plant Sci. 2023 Jun 9;14:1187205. doi: 10.3389/fpls.2023.1187205 (PMC10289064; doi:10.3389/fpls.2023.1187205)
Supplement: Supplementary file 1 [file Table_1.xlsx]

## Sheet: Cultivars
List of the cultivars included in the molecular fingerprinting
Species	ID	Name
R. asiaticus	606	S® Viola/Bianco
R. asiaticus	928	PP® Fucsia
R. asiaticus	561	S® Rosa
R. asiaticus	942	PP® Bianco
R. asiaticus	229	S® Bianco
R. asiaticus	311	S® TestaRossa
R. asiaticus	729	PP® Rs
R. asiaticus	753	S® Pastello
R. asiaticus	8	SU® Arancio
R. asiaticus	767	S® Pastello
R. asiaticus	556	S® Ciclamino
R. asiaticus	945	PP® Rosso
R. asiaticus	560	S® 560CIC
R. asiaticus	418	S® Rosa
R. asiaticus	511	S® Crema
R. asiaticus	773	S® Gia/Red
R. asiaticus	948	PP® Fucsia
R. asiaticus	78	S® Bianco/Rosa
A. coronaria	Bordeaux	Bordeaux
A. coronaria	Rosa	Rosa
A. coronaria	Tigre	Tigre
A. coronaria	Edge	Edge
A. coronaria	Magenta	Magenta
A. coronaria	Tigre Wine	Tigre Wine
