# Supplementary material for: Diversity analyses in two ornamental and large-genome Ranunculaceae species based on a low-cost Klenow NGS-based protocol
Source: Front Plant Sci. 2023 Jun 9;14:1187205. doi: 10.3389/fpls.2023.1187205 (PMC10289064; doi:10.3389/fpls.2023.1187205)
Supplement: Supplementary file 2 [file Table_2.xlsx]

## Sheet: PrimerExplorer2_Output
Primer Explorer 2 output for the A. oxysepala genome
Number of sequenciable products between 100-1000 bp						Cells in red: Short products are more than 10% of amplificable
		Primer_1	Primer_2	Primer_3	Primer_4	Primer_5	Primer_6	Primer_7	Primer_8	Primer_9	Primer_10			LEGEND
		TCATCTTC	TCTTTCTC	TAGGGTTT	AAACCCAA	AGAGAAAG	TGAAGATG	TTGTTTGG	CAAACACA	TGGAAGAA	TTCCTTCT			Code	Description
Primer_1	TCATCTTC		3376	3659	6877	3647	4350	2723	4072	3723	2818			P1_COUNT	Num Union sites os primer1
Primer_2	TCTTTCTC			3036	4280	3914	2978	2068	2641	2684	2170			P2_COUNT	Num Union sites os primer2
Primer_3	TAGGGTTT				6302	2786	1801	2242	4029	1643	3807			NP10K	Num of possible products(length < 10000
Primer_4	AAACCCAA					2751	2655	3771	2472	2278	3200			NP700	Num of possible products(length < 700
Primer_5	AGAGAAAG						1939	2309	2267	1828	2557			NSP	Num of short products(length < 100
Primer_6	TGAAGATG							1962	2522	1889	2204			NSECP	Num of sequentiable products(100-700)
Primer_7	TTGTTTGG								2906	1532	1655			NUUP	Num of unique unique products (100-700)
Primer_8	CAAACACA									2183	1918			NRRP	Num of repetitive repetitive products (100-700)
Primer_9	TGGAAGAA										2124			NURP	Num of unique repetitive products (100-700)
Primer_10	TTCCTTCT													PSN	Percentage of sequenciable nucleotides
														APSN	Adjusted Percentage of sequenciable nucleotides
	P1_COUNT	P2_COUNT	NP10K	NP700	NSP	NSECP	NUUP	NRRP	NURP	PSN	APSN
Pair P1-P2	50200	43747	36484	3653	277	3376	3376	0	0	0	0
Pair P1-P3	50200	43587	36831	4257	598	3659	3659	0	0	0	0
Pair P1-P4	50200	42532	43289	7184	307	6877	6877	0	0	0	0
Pair P1-P5	50200	40656	37121	4500	853	3647	3647	0	0	0	0
Pair P1-P6	50200	37255	53166	21934	17584	4350	4350	0	0	0	0
Pair P1-P7	50200	36135	30848	3083	360	2723	2723	0	0	0	0
Pair P1-P8	50200	35693	34616	4318	246	4072	4072	0	0	0	0
Pair P1-P9	50200	34075	30967	4666	943	3723	3723	0	0	0	0
Pair P1-P10	50200	32281	27689	3106	288	2818	2818	0	0	0	0
Pair P2-P3	43747	43587	31978	3906	870	3036	3036	0	0	0	0
Pair P2-P4	43747	42532	33502	4593	313	4280	4280	0	0	0	0
Pair P2-P5	43747	40656	57927	28931	25017	3914	3914	0	0	0	0
Pair P2-P6	43747	37255	28502	3425	447	2978	2978	0	0	0	0
Pair P2-P7	43747	36135	25378	2295	227	2068	2068	0	0	0	0
Pair P2-P8	43747	35693	26540	2857	216	2641	2641	0	0	0	0
Pair P2-P9	43747	34075	26698	3240	556	2684	2684	0	0	0	0
Pair P2-P10	43747	32281	23166	2337	167	2170	2170	0	0	0	0
Pair P3-P4	43587	42532	39779	7131	829	6302	6302	0	0	0	0
Pair P3-P5	43587	40656	30371	3199	413	2786	2786	0	0	0	0
Pair P3-P6	43587	37255	26026	2009	208	1801	1801	0	0	0	0
Pair P3-P7	43587	36135	26094	2489	247	2242	2242	0	0	0	0
Pair P3-P8	43587	35693	30820	4861	832	4029	4029	0	0	0	0
Pair P3-P9	43587	34075	22759	1883	240	1643	1643	0	0	0	0
Pair P3-P10	43587	32281	25657	4068	261	3807	3807	0	0	0	0
Pair P4-P5	42532	40656	28365	3115	364	2751	2751	0	0	0	0
Pair P4-P6	42532	37255	27775	2844	189	2655	2655	0	0	0	0
Pair P4-P7	42532	36135	31799	4885	1114	3771	3771	0	0	0	0
Pair P4-P8	42532	35693	24431	2585	113	2472	2472	0	0	0	0
Pair P4-P9	42532	34075	25890	2493	215	2278	2278	0	0	0	0
Pair P4-P10	42532	32281	25474	3334	134	3200	3200	0	0	0	0
Pair P5-P6	40656	37255	25092	2101	162	1939	1939	0	0	0	0
Pair P5-P7	40656	36135	25749	2627	318	2309	2309	0	0	0	0
Pair P5-P8	40656	35693	24990	2523	256	2267	2267	0	0	0	0
Pair P5-P9	40656	34075	22908	2035	207	1828	1828	0	0	0	0
Pair P5-P10	40656	32281	24470	3158	601	2557	2557	0	0	0	0
Pair P6-P7	37255	36135	23049	2217	255	1962	1962	0	0	0	0
Pair P6-P8	37255	35693	24000	2743	221	2522	2522	0	0	0	0
Pair P6-P9	37255	34075	23081	2089	200	1889	1889	0	0	0	0
Pair P6-P10	37255	32281	21672	2471	267	2204	2204	0	0	0	0
Pair P7-P8	36135	35693	26836	3262	356	2906	2906	0	0	0	0
Pair P7-P9	36135	34075	19480	1664	132	1532	1532	0	0	0	0
Pair P7-P10	36135	32281	20003	1772	117	1655	1655	0	0	0	0
Pair P8-P9	35693	34075	22487	2338	155	2183	2183	0	0	0	0
Pair P8-P10	35693	32281	21093	2078	160	1918	1918	0	0	0	0
Pair P9-P10	34075	32281	20507	2525	401	2124	2124	0	0	0	0
