# Supplementary material for: Diversity analyses in two ornamental and large-genome Ranunculaceae species based on a low-cost Klenow NGS-based protocol
Source: Front Plant Sci. 2023 Jun 9;14:1187205. doi: 10.3389/fpls.2023.1187205 (PMC10289064; doi:10.3389/fpls.2023.1187205)
Supplement: Supplementary file 3 [file Table_3.xlsx]

## Sheet: Primers
Primer sequences
Primer Name	Primer Sequence
kseq_daptF-P1-Ran	TCGTCGGCAGCGTCAGATGTGTATAAGAGACAGNNNTCATCTTC
kseq_adaptR-P3-Ran	GTCTCGTGGGCTCGGAGATGTGTATAAGAGACAGNNNTAGGGTTT
kseq_adaptR-P6-Ran	GTCTCGTGGGCTCGGAGATGTGTATAAGAGACAGNNNTGAAGATG
kseq_adaptR-P5-Ran	GTCTCGTGGGCTCGGAGATGTGTATAAGAGACAGNNNAGAGAAAG
