# Supplementary material for: Diversity analyses in two ornamental and large-genome Ranunculaceae species based on a low-cost Klenow NGS-based protocol
Source: Front Plant Sci. 2023 Jun 9;14:1187205. doi: 10.3389/fpls.2023.1187205 (PMC10289064; doi:10.3389/fpls.2023.1187205)
Supplement: Supplementary file 4 [file Table_4.xlsx]

## Sheet: Ranunculus_RawReads
Sequencing data output for R. asiaticus
Sample	Library_Flowcell_Lane	Raw reads	Raw data	Effective(%)	Error(%)	Q20(%)	Q30(%)	GC(%)
606	EKDL220005598-1a-AK1568-N508_HL5H7DSX3_L2	2310922	1.1	99.96	0.03	94.66	89.52	53.20
606	EKDL220005598-1a-AK1568-N508_HJYWTDSX3_L4	4815670		100.00	0.03	94.23	88.31	52.88
928	EKDL220005598-1a-N701-AK419_HJYWTDSX3_L4	2442618	0.5	100.00	0.03	94.60	89.03	51.73
928	EKDL220005598-1a-N701-AK419_HL5H7DSX3_L2	1157252		99.96	0.03	94.80	89.83	52.25
561	EKDL220005598-1a-AK1858-N508_HL5H7DSX3_L2	1441206	0.7	99.96	0.03	94.95	89.71	53.08
561	EKDL220005598-1a-AK1858-N508_HJYWTDSX3_L4	2942404		100.00	0.03	94.67	88.67	52.63
942	EKDL220005598-1a-N702-AK419_HL5H7DSX3_L2	361318	0.2	99.96	0.03	95.25	90.16	53.70
942	EKDL220005598-1a-N702-AK419_HJYWTDSX3_L4	707910		100.00	0.03	95.26	89.70	52.98
229	EKDL220005598-1a-AK366-N508_HL5H7DSX3_L2	5132476	2.4	99.96	0.03	94.91	89.66	51.89
229	EKDL220005598-1a-AK366-N508_HJYWTDSX3_L4	10706760		100.00	0.03	94.71	88.72	51.53
311	EKDL220005598-1a-AK205-N508_HL5H7DSX3_L2	6173294	2.8	99.96	0.03	95.08	89.96	52.59
311	EKDL220005598-1a-AK205-N508_HJYWTDSX3_L4	12685488		100.00	0.03	94.88	89.08	52.04
929	EKDL220005598-1a-AK1572-N508_HJYWTDSX3_L4	10021110	2.2	100.00	0.03	94.47	88.55	52.38
929	EKDL220005598-1a-AK1572-N508_HL5H7DSX3_L2	4775438		99.96	0.03	94.67	89.51	52.93
753	EKDL220005598-1a-AK1579-N508_HJYWTDSX3_L4	7849094	1.7	100.00	0.03	95.11	89.34	53.45
753	EKDL220005598-1a-AK1579-N508_HL5H7DSX3_L2	3693778		99.96	0.03	95.32	90.22	53.85
422	EKDL220005598-1a-AK1583-N508_HJYWTDSX3_L4	6459858	1.4	100.00	0.03	94.91	88.89	53.27
422	EKDL220005598-1a-AK1583-N508_HL5H7DSX3_L2	3105028		99.96	0.03	95.06	89.76	53.93
8	EKDL220005598-1a-AK1859-N508_HL5H7DSX3_L2	2601340	1.2	99.96	0.03	95.80	90.72	53.80
8	EKDL220005598-1a-AK1859-N508_HJYWTDSX3_L4	5475018		100.00	0.03	95.40	89.62	53.28
767	EKDL220005598-1a-AK1581-N508_HL5H7DSX3_L2	2372000	1.1	99.96	0.03	95.57	90.43	51.66
767	EKDL220005598-1a-AK1581-N508_HJYWTDSX3_L4	5034792		100.00	0.03	95.19	89.29	51.37
556	EKDL220005598-1a-AK1585-N508_HJYWTDSX3_L4	7004050	1.6	100.00	0.03	94.79	88.64	51.92
556	EKDL220005598-1a-AK1585-N508_HL5H7DSX3_L2	3406878		99.96	0.03	95.12	89.74	52.29
945	EKDL220005598-1a-N703-AK419_HJYWTDSX3_L4	3384646	0.7	100.00	0.03	94.86	89.20	52.42
945	EKDL220005598-1a-N703-AK419_HL5H7DSX3_L2	1613068		99.96	0.03	95.06	90.04	52.87
560	EKDL220005598-1a-AK1586-N508_HL5H7DSX3_L2	1098114	0.5	99.97	0.03	95.36	90.18	53.60
560	EKDL220005598-1a-AK1586-N508_HJYWTDSX3_L4	2280696		100.00	0.03	95.08	89.22	53.04
418	EKDL220005598-1a-N710-N508_HJYWTDSX3_L4	8286802	1.8	100.00	0.03	94.76	88.56	52.07
418	EKDL220005598-1a-N710-N508_HL5H7DSX3_L2	3970806		99.96	0.03	95.05	89.66	52.41
511	EKDL220005598-1a-AK1584-N508_HL5H7DSX3_L2	1976360	0.9	99.96	0.03	95.31	89.83	52.41
511	EKDL220005598-1a-AK1584-N508_HJYWTDSX3_L4	4048122		100.00	0.03	94.90	88.65	52.14
773	EKDL220005598-1a-AK1582-AK419_HL5H7DSX3_L2	1717392	0.8	99.96	0.03	95.28	90.24	51.86
773	EKDL220005598-1a-AK1582-AK419_HJYWTDSX3_L4	3648052		100.00	0.03	94.99	89.24	51.59
948	EKDL220005598-1a-N704-AK419_HJYWTDSX3_L4	2469136	0.5	100.00	0.03	95.22	89.56	51.95
948	EKDL220005598-1a-N704-AK419_HL5H7DSX3_L2	1163602		99.96	0.03	95.15	89.97	52.26
78	EKDL220005598-1a-AK1860-N508_HJYWTDSX3_L4	10827740	2.4	100.00	0.03	94.83	88.96	52.47
78	EKDL220005598-1a-AK1860-N508_HL5H7DSX3_L2	5150184		99.96	0.03	95.03	89.87	52.9

## Sheet: Anemone_RawReads
Sequencing data output for A. coronaria
Sample	Library_Flowcell_Lane	Raw reads	Raw data	Effective(%)	Error(%)	Q20(%)	Q30(%)	GC(%)
Bordeaux	EKDL220005598-1a-AK1860-AK419_HL5H7DSX3_L2	1223886	0.6	99.96	0.03	95.36	90.69	53.90
Bordeaux	EKDL220005598-1a-AK1860-AK419_HJYWTDSX3_L4	2585454		100.00	0.03	95.11	89.78	53.39
Rosa	EKDL220005598-1a-AK1859-AK419_HJYWTDSX3_L4	3933018	0.9	100.00	0.03	95.37	90.09	53.20
Rosa	EKDL220005598-1a-AK1859-AK419_HL5H7DSX3_L2	1871214		99.96	0.03	95.68	90.97	53.73
Tigre	EKDL220005598-1a-AK366-AK419_HL5H7DSX3_L2	2205034	1.0	99.96	0.03	95.11	90.37	53.92
Tigre	EKDL220005598-1a-AK366-AK419_HJYWTDSX3_L4	4664510		100.00	0.03	94.99	89.64	53.52
Edge	EKDL220005598-1a-N710-AK419_HL5H7DSX3_L2	405370	0.2	99.97	0.03	95.44	90.63	52.39
Edge	EKDL220005598-1a-N710-AK419_HJYWTDSX3_L4	863632		100.00	0.03	95.15	89.62	51.96
Magenta	EKDL220005598-1a-N705-AK419_HL5H7DSX3_L2	1634300	0.8	99.96	0.03	95.08	90.36	54.15
Magenta	EKDL220005598-1a-N705-AK419_HJYWTDSX3_L4	3447238		100.00	0.03	94.91	89.55	53.62
Tigre Wine	EKDL220005598-1a-AK205-AK419_HJYWTDSX3_L4	2144288	0.5	100.00	0.03	95.18	89.82	52.93
Tigre Wine	EKDL220005598-1a-AK205-AK419_HL5H7DSX3_L2	1040070		99.96	0.03	95.42	90.75	53.54
